# Supplementary material
Source: publisher figshare collection journal article supplement (https://tandf.figshare.com/ndownloader/files/23209211)

**Diacetoxy iodobenzene mediated regioselective synthesis and characterization of novel [1,2,4]triazolo[4,3-a]pyrimidines: Apoptosis inducer, antiproliferative activities and molecular docking studies**

Raj Kamala*, Ravinder Kumara, Vipan Kumara, Jitender K. Bhardwajb*, Priyanka Sarafb, Ajay Kumarc, Kritika Panditc, Satwinderjeet Kaurc, Chetti Prabhakard and Satyajit Beurad

aDepartment of Chemistry, Kurukshetra University, Kurukshetra-136119, Haryana (INDIA), *E-mail: kamalraj_sharma@rediffmail.com

bDepartment of Zoology, Kurukshetra University, Kurukshetra-136119, Haryana (INDIA), *E-mail: jkbkuk@gmail.com

cDepartment of Botanical & Environmental Sciences, Guru Nanak Dev University, Amritsar-143005, Punjab (INDIA), E-mail: sjkaur2011@gmail.com

dDepartment of Chemistry, National Institute of Technology (NIT), Kurukshetra-136119, Haryana (INDIA), E-mail: [chetti@nitkkr.ac.in](mailto:chetti@nitkkr.ac.in)

**1H & 13C NMR SPECTRA: 5-Methyl-3,7-diphenyl-[1,2,4]triazolo[4,3-a]pyrimidine (2a)**

**

**

**

**

**HRMS SPECTRA: 5-Methyl-3,7-diphenyl-[1,2,4]triazolo[4,3-a]pyrimidine (2a); HRMS m/z [M+H]+ calcd for C18H14N4: 287.1259, found: 287.2319.**

**

**

**1H & 13C NMR SPECTRA: 5-Methyl-3-(4-methylphenyl)-7-phenyl-[1,2,4]triazolo[4,3-a]pyrimidine (2b)**

**



**

**HRMS SPECTRA: 5-Methyl-3-(4-methylphenyl)-7-phenyl-[1,2,4]triazolo[4,3-a]pyrimidine (2b); HRMS m/z [M+H]+ calcd for C19H16N4: 301.1459, found: 301.3771.**

**

**

**1H & 13C NMR: 3-(4-Methoxyphenyl)-5-methyl-7-phenyl-[1,2,4]triazolo[4,3-a] pyrimidine (2c)**

**

**

**

**

**HRMS SPECTRA: 3-(4-Methoxyphenyl)-5-methyl-7-phenyl-[1,2,4]triazolo[4,3-a] pyrimidine (2c); HRMS m/z [M+H]+ calcd for C19H16N4O: 317.1359, found: 317.3670.**

**

**

**1H & 13C NMR: 3-(4-Chlorophenyl)-5-methyl-7-phenyl-[1,2,4]triazolo[4,3-a] pyrimidine (2d)**

**

**

**

**

**HRMS SPECTRA: 3-(4-Chlorophenyl)-5-methyl-7-phenyl-[1,2,4]triazolo[4,3-a] pyrimidine (2d); HRMS m/z [M+H]+ calcd for C18H13ClN4: 321.0859, found: 321.7870.**

**

**

**1H & 13C NMR: 3-(2-Chlorophenyl)-5-methyl-7-phenyl-[1,2,4]triazolo[4,3-a] pyrimidine (2e)**








**HRMS: 3-(2-Chlorophenyl)-5-methyl-7-phenyl-[1,2,4]triazolo[4,3-a] pyrimidine (2e); HRMS m/z [M+H]+ calcd for C18H13ClN4: 321.0859, found: 321.7801.**





**1H & 13C NMR: 3-(4-Isopropylphenyl)-5-methyl-7-phenyl-[1,2,4]triazolo[4,3-a]pyrimidine (2f)**

**

**

**

**

**HRMS: 3-(4-Isopropylphenyl)-5-methyl-7-phenyl-[1,2,4]triazolo[4,3-a]pyrimidine (2f); HRMS m/z [M+H]+calcd for C21H20N4: 329.1759, found: 329.4271.**

**


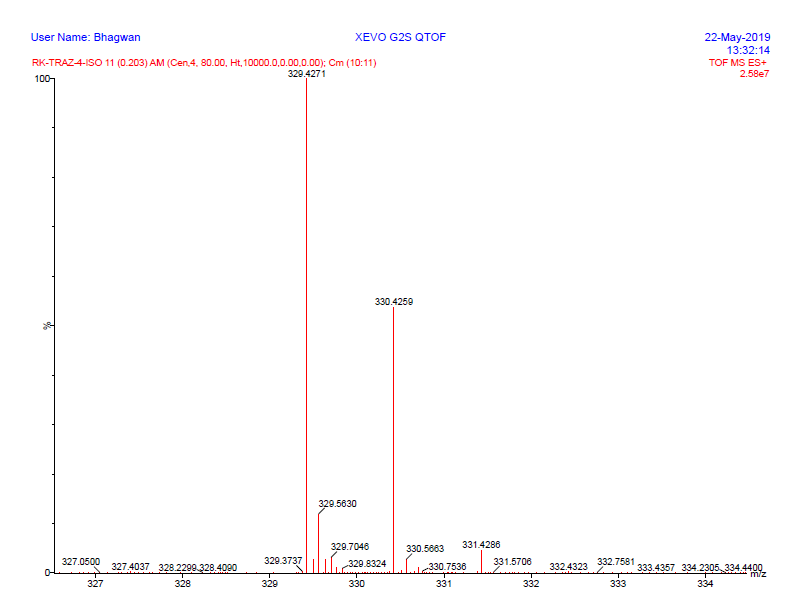
**

**1H & 13C NMR: 3-(2,4-Dichlorophenyl)-5-methyl-7-phenyl-[1,2,4]triazolo[4,3-a]pyrimidine (2g)**

**

**

**

**

**HRMS SPECTRA: 3-(2,4-Dichlorophenyl)-5-methyl-7-phenyl-[1,2,4]triazolo[4,3-a]pyrimidine (2g); HRMS m/z [M+H]+calcd for C18H12Cl2N4: 355.0459, found: 355.7844.**

**

**

**1H & 13C NMR: 3-(2,5-Dimethoxyphenyl)-5-methyl-7-phenyl-[1,2,4]triazolo [4,3-a]pyrimidine (2h)**

**



**

**HRMS SPECTRA: 3-(2,5-Dimethoxyphenyl)-5-methyl-7-phenyl-[1,2,4]triazolo [4,3-a]pyrimidine (2h); HRMS m/z [M+H]+calcd for C20H18N4O2: 347.1659, found: 348.1852.**

**

**

**1H & 13C NMR: 3-(3-Methoxyphenyl)-5-methyl-7-phenyl-[1,2,4]triazolo[4,3-a] pyrimidine (2i)**

**



**

**HRMS SPECTRA: 3-(3-Methoxyphenyl)-5-methyl-7-phenyl-[1,2,4]triazolo[4,3-a] pyrimidine (2i); HRMS m/z [M+H]+ calcd for C19H16N4O: 317.1659, found: 317.3670.**

**

**

**



1H & 13C NMR: 5-Methyl-3-(naphthalen-1-yl)-7-phenyl-[1,2,4]triazolo[4,3-a] pyrimidine (2j)**

**HRMS SPECTRA: 5-Methyl-3-(naphthalen-1-yl)-7-phenyl-[1,2,4]triazolo[4,3-a] pyrimidine (2j); HRMS m/z [M+H]+ calcd for C22H16N4: 337.1459, found: 337.4071.**

**

**

**1H & 13C NMR: 3-(4-(Trifluoromethyl)phenyl)-5-methyl-7-phenyl-[1,2,4] triazolo[4,3-a]pyrimidine (2k)**

**

**

**

**

**HRMS SPECTRA: 3-(4-(Trifluoromethyl)phenyl)-5-methyl-7-phenyl-[1,2,4] triazolo[4,3-a]pyrimidine (2k); HRMS m/z [M+H]+ calcd for C19H13F3N4: 355.1159, found: 355.3470.**

**

**

**1H & 13C NMR: 3-(4-Methoxyphenyl)-7-methyl-5-phenyl-[1,2,4]triazolo[4,3-a] pyrimidine (2c')**

**



**

**1H & 13C NMR: 3-(4-Isopropylphenyl)-7-methyl-5-phenyl-[1,2,4]triazolo[4,3-a]pyrimidine (2f')**

**



**

**1H & 13C NMR: 3-(2,4-Dichlorophenyl)-7-methyl-5-phenyl-[1,2,4]triazolo[4,3-a]pyrimidine (2g')**

**



**
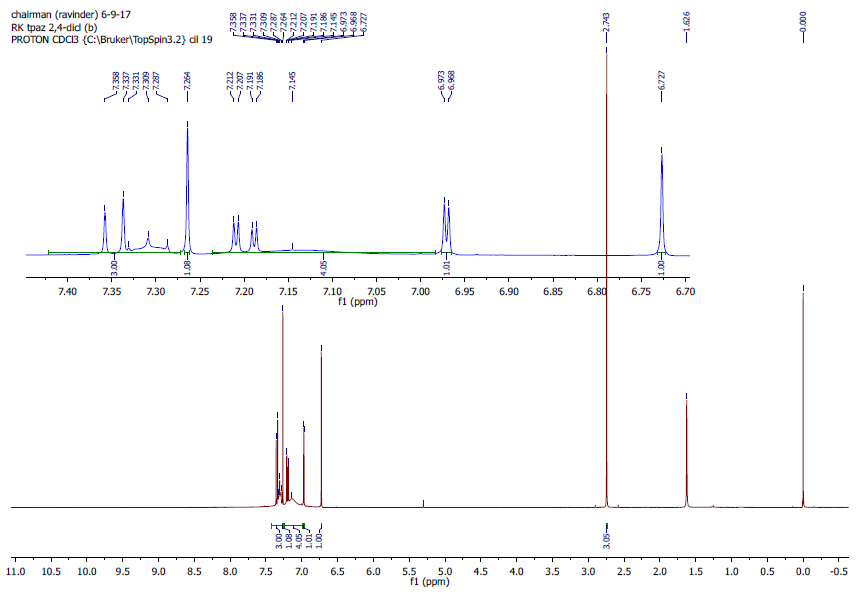

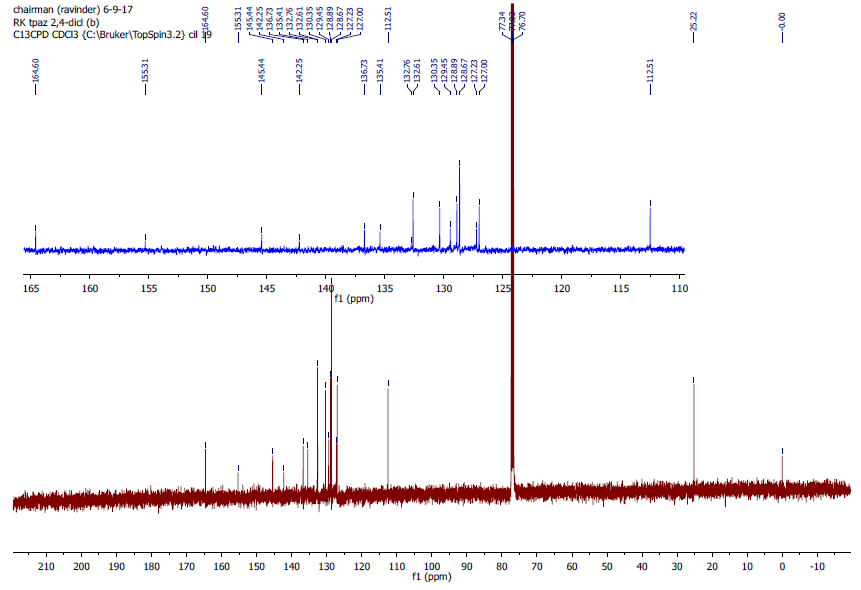


**Table S1. Atomic coordinates (x 104) and equivalent isotropic displacement parameters (Å2x 103)**

**for 3-(4-methoxyphenyl)-5-methyl-7-phenyl-[1,2,4]triazolo[4,3-a] pyrimidine (2c). U(eq) is defined as one third of the trace of the orthogonalized Uij tensor.**

| X | Y | Z | U(eq) |
| --- | --- | --- | --- |
| N(2) | 4623(1) | 8456(2) | 3660(1) |
| N(1) | 5430(1) | 8526(2) | 3831(1) |
| O(1) | 2382(1) | 8907(2) | 2914(1) |
| N(4) | 4506(1) | 11289(2) | 3650(1) |
| N(3) | 4966(1) | 11057(2) | 3764(1) |
| C(9) | 4621(1) | 6640(2) | 3700(1) |
| C(7) | 5425(1) | 6800(2) | 3843(1) |
| C(8) | 5022(1) | 5828(2) | 3788(1) |
| C(13) | 3798(1) | 9519(2) | 3404(1) |
| C(11) | 4193(1) | 5712(2) | 3650(1) |
| C(10) | 5032(1) | 9351(2) | 3759(1) |
| C(18) | 3412(1) | 9534(2) | 2442(1) |
| C(12) | 4301(1) | 9762(2) | 3588(1) |
| C(6) | 5858(1) | 5878(2) | 3917(1) |
| C(14) | 3692(1) | 9289(3) | 4174(1) |
| C(16) | 2836(1) | 9119(2) | 3017(1) |
| C(17) | 2932(1) | 9335(2) | 2239(1) |
| C(15) | 3217(1) | 9084(3) | 3979(1) |
| C(1) | 5840(1) | 4119(3) | 3675(1) |
| C(5) | 6291(1) | 6779(3) | 4218(2) |
| C(19) | 1978(1) | 8906(3) | 1932(2) |
| C(3) | 6673(1) | 4208(4) | 4030(2) |
| C(2) | 6245(1) | 3300(3) | 3732(2) |
| C(4) | 6696(1) | 5948(4) | 4280(2) |

**Table S2. Bond lengths [Å] and angles [°] for 3-(4-methoxyphenyl)-5-methyl-7-phenyl-[1,2,4] triazolo[4,3-a] pyrimidine (2c).**

| N(2)-C(12) | 1.3802(19) |
| --- | --- |
| N(2)-C(9) | 1.3835(19) |
| N(2)-C(10) | 1.3940(17) |
| N(1)-C(7) | 1.314(2) |
| N(1)-C(10) | 1.3504(19) |
| O(1)-C(16) | 1.3631(19) |
| O(1)-C(19) | 1.421(2) |
| N(4)-C(12) | 1.308(2) |
| N(4)-N(3) | 1.3750(19) |
| N(3)-C(10) | 1.315(2) |
| C(9)-C(8) | 1.344(2) |
| C(9)-C(11) | 1.485(2) |
| C(7)-C(8) | 1.428(2) |
| C(7)-C(6) | 1.482(2) |
| C(8)-H(8) | 0.93 |
| C(13)-C(18) | 1.380(2) |
| C(13)-C(14) | 1.384(2) |
| C(13)-C(12) | 1.471(2) |
| C(11)-H(11A) | 0.96 |
| C(11)-H(11B) | 0.96 |
| C(11)-H(11C) | 0.96 |
| C(18)-C(17) | 1.384(2) |
| C(18)-H(18) | 0.93 |
| C(6)-C(5) | 1.382(2) |
| C(6)-C(1) | 1.383(3) |
| C(14)-C(15) | 1.373(2) |
| C(14)-H(14) | 0.93 |
| C(16)-C(17) | 1.373(3) |
| C(16)-C(15) | 1.375(3) |
| C(17)-H(17) | 0.93 |
| C(15)-H(15) | 0.93 |
| C(1)-C(2) | 1.377(2) |
| C(1)-H(1) | 0.93 |
| C(5)-C(4) | 1.379(3) |
| C(5)-H(5) | 0.93 |
| C(19)-H(19A) | 0.96 |
| C(19)-H(19B) | 0.96 |
| C(19)-H(19C) | 0.96 |
| C(3)-C(4) | 1.370(4) |
| C(3)-C(2) | 1.373(3) |
| C(3)-H(3) | 0.93 |
| C(2)-H(2) | 0.93 |
| C(4)-H(4) | 0.93 |
| C(12)-N(2)-C(9) | 134.88(12) |
| C(12)-N(2)-C(10) | 104.67(12) |
| C(9)-N(2)-C(10) | 120.36(12) |
| C(7)-N(1)-C(10) | 116.58(13) |
| C(16)-O(1)-C(19) | 117.80(16) |
| C(12)-N(4)-N(3) | 109.95(14) |
| C(10)-N(3)-N(4) | 106.55(13) |
| C(8)-C(9)-N(2) | 116.17(13) |
| C(8)-C(9)-C(11) | 124.19(14) |
| N(2)-C(9)-C(11) | 119.64(13) |
| N(1)-C(7)-C(8) | 122.32(13) |
| N(1)-C(7)-C(6) | 117.15(13) |
| C(8)-C(7)-C(6) | 120.54(14) |
| C(9)-C(8)-C(7) | 121.41(14) |
| C(9)-C(8)-H(8) | 119.3 |
| C(7)-C(8)-H(8) | 119.3 |
| C(18)-C(13)-C(14) | 117.63(15) |
| C(18)-C(13)-C(12) | 120.41(15) |
| C(14)-C(13)-C(12) | 121.96(15) |
| C(9)-C(11)-H(11A) | 109.5 |
| C(9)-C(11)-H(11B) | 109.5 |
| H(11A)-C(11)-H(11B) | 109.5 |
| C(9)-C(11)-H(11C) | 109.5 |
| H(11A)-C(11)-H(11C) | 109.5 |
| H(11B)-C(11)-H(11C) | 109.5 |
| N(3)-C(10)-N(1) | 126.89(14) |
| N(3)-C(10)-N(2) | 110.07(13) |
| N(1)-C(10)-N(2) | 123.04(14) |
| C(13)-C(18)-C(17) | 122.16(16) |
| C(13)-C(18)-H(18) | 118.9 |
| C(17)-C(18)-H(18) | 118.9 |
| N(4)-C(12)-N(2) | 108.76(14) |
| N(4)-C(12)-C(13) | 124.57(14) |
| N(2)-C(12)-C(13) | 126.55(13) |
| C(5)-C(6)-C(1) | 118.46(16) |
| C(5)-C(6)-C(7) | 120.20(16) |
| C(1)-C(6)-C(7) | 121.34(15) |
| C(15)-C(14)-C(13) | 120.60(16) |
| C(15)-C(14)-H(14) | 119.7 |
| C(13)-C(14)-H(14) | 119.7 |
| O(1)-C(16)-C(17) | 124.65(16) |
| O(1)-C(16)-C(15) | 115.85(16) |
| C(17)-C(16)-C(15) | 119.49(15) |
| C(16)-C(17)-C(18) | 119.09(16) |
| C(16)-C(17)-H(17) | 120.5 |
| C(18)-C(17)-H(17) | 120.5 |
| C(14)-C(15)-C(16) | 121.02(17) |
| C(14)-C(15)-H(15) | 119.5 |
| C(16)-C(15)-H(15) | 119.5 |
| C(2)-C(1)-C(6) | 120.2(2) |
| C(2)-C(1)-H(1) | 119.9 |
| C(6)-C(1)-H(1) | 119.9 |
| C(4)-C(5)-C(6) | 121.0(2) |
| C(4)-C(5)-H(5) | 119.5 |
| C(6)-C(5)-H(5) | 119.5 |
| O(1)-C(19)-H(19A) | 109.5 |
| O(1)-C(19)-H(19B) | 109.5 |
| H(19A)-C(19)-H(19B) | 109.5 |
| O(1)-C(19)-H(19C) | 109.5 |
| H(19A)-C(19)-H(19C) | 109.5 |
| H(19B)-C(19)-H(19C) | 109.5 |
| C(4)-C(3)-C(2) | 119.39(19) |
| C(4)-C(3)-H(3) | 120.3 |
| C(2)-C(3)-H(3) | 120.3 |
| C(3)-C(2)-C(1) | 120.8(2) |
| C(3)-C(2)-H(2) | 119.6 |
| C(1)-C(2)-H(2) | 119.6 |
| C(3)-C(4)-C(5) | 120.1(2) |
| C(3)-C(4)-H(4) | 120 |
| C(5)-C(4)-H(4) | 120 |

Symmetry transformations used to generate equivalent atoms.

**Table S3. Anisotropic displacement parameters (Å2x 103) for 3-(4-methoxyphenyl)-5-methyl-7-phenyl-[1,2,4]triazolo[4,3-a] pyrimidine (2c).The anisotropic displacement factor exponent takes the form: -2π2[ h2a*2U11 + ... + 2 h k a* b* U12]**

|  | U11 | U22 | U33 | U23 | U13 | U12 |
| --- | --- | --- | --- | --- | --- | --- |
| N(2) | 34(1) | 32(1) | 47(1) | -2(1) | 19(1) | -3(1) |
| N(1) | 38(1) | 43(1) | 55(1) | -1(1) | 23(1) | -5(1) |
| O(1) | 41(1) | 99(1) | 80(1) | -4(1) | 31(1) | -1(1) |
| N(4) | 51(1) | 36(1) | 99(1) | -2(1) | 39(1) | -3(1) |
| N(3) | 52(1) | 35(1) | 98(1) | -2(1) | 39(1) | -6(1) |
| C(9) | 40(1) | 32(1) | 43(1) | 0(1) | 18(1) | -2(1) |
| C(7) | 37(1) | 43(1) | 41(1) | -1(1) | 18(1) | 0(1) |
| C(8) | 40(1) | 33(1) | 52(1) | -1(1) | 22(1) | 0(1) |
| C(13) | 40(1) | 31(1) | 58(1) | -1(1) | 23(1) | 2(1) |
| C(11) | 44(1) | 33(1) | 70(1) | 0(1) | 29(1) | -4(1) |
| C(10) | 38(1) | 37(1) | 55(1) | -1(1) | 21(1) | -6(1) |
| C(18) | 51(1) | 62(1) | 56(1) | 2(1) | 27(1) | -4(1) |
| C(12) | 43(1) | 32(1) | 58(1) | 0(1) | 24(1) | 2(1) |
| C(6) | 41(1) | 56(1) | 44(1) | 3(1) | 23(1) | 6(1) |
| C(14) | 45(1) | 71(1) | 52(1) | -4(1) | 19(1) | 1(1) |
| C(16) | 40(1) | 48(1) | 63(1) | -5(1) | 25(1) | 2(1) |
| C(17) | 44(1) | 65(1) | 55(1) | 2(1) | 16(1) | -4(1) |
| C(15) | 52(1) | 83(1) | 59(1) | -6(1) | 31(1) | -2(1) |
| C(1) | 56(1) | 62(1) | 71(1) | 2(1) | 33(1) | 13(1) |
| C(5) | 48(1) | 77(1) | 74(1) | 0(1) | 34(1) | 0(1) |
| C(19) | 38(1) | 79(1) | 94(2) | 7(1) | 22(1) | 4(1) |
| C(3) | 67(1) | 116(2) | 78(1) | 24(1) | 46(1) | 43(1) |
| C(2) | 79(2) | 81(2) | 89(2) | 8(1) | 48(1) | 33(1) |
| C(4) | 49(1) | 110(2) | 89(2) | 11(1) | 40(1) | 8(1) |

**Table S4. Hydrogen coordinates (x 104) and isotropic displacement parameters (Å2x 103)**

**for 3-(4-methoxyphenyl)-5-methyl-7-phenyl-[1,2,4]triazolo[4,3-a] pyrimidine (2c).**

|  | X | Y | Z | U(eq) |
| --- | --- | --- | --- | --- |
| H(8) | 5037 | 4607 | 3814 | 50 |
| H(11A) | 4243 | 4465 | 3665 | 73 |
| H(11B) | 3904 | 6023 | 3043 | 73 |
| H(11C) | 4153 | 6047 | 4211 | 73 |
| H(18) | 3476 | 9682 | 1914 | 67 |
| H(14) | 3944 | 9273 | 4831 | 69 |
| H(17) | 2679 | 9348 | 1584 | 69 |
| H(15) | 3153 | 8920 | 4505 | 75 |
| H(1) | 5553 | 3487 | 3474 | 74 |
| H(5) | 6309 | 7963 | 4382 | 77 |
| H(19A) | 1948 | 10042 | 1635 | 112 |
| H(19B) | 1684 | 8642 | 1959 | 112 |
| H(19C) | 2028 | 8033 | 1538 | 112 |
| H(3) | 6944 | 3647 | 4062 | 99 |
| H(2) | 6229 | 2118 | 3566 | 95 |
| H(4) | 6986 | 6570 | 4490 | 96 |

**Table S5. Atomic coordinates (x 104) and equivalent isotropic displacement parameters (Å2x 103) for 3-(2,5-dimethoxyphenyl)-5-methyl-7-phenyl-[1,2,4]triazolo [4,3-a]pyrimidine (2h). U (eq) is defined as one third of the trace of the orthogonalized Uij tensor.**

|  | X | Y | Z | U(eq) |
| --- | --- | --- | --- | --- |
| O(1) | 7543(2) | 4016(1) | 1158(1) | 55(1) |
| N(2) | 8073(2) | 4392(1) | 3777(1) | 35(1) |
| O(2) | 9418(2) | 6691(1) | 847(2) | 63(1) |
| N(1) | 8515(2) | 3714(1) | 5518(2) | 41(1) |
| N(4) | 10851(3) | 4143(1) | 4544(2) | 54(1) |
| N(3) | 10879(3) | 4517(1) | 3539(2) | 54(1) |
| C(9) | 6249(3) | 4422(1) | 3789(2) | 34(1) |
| C(7) | 6772(3) | 3715(1) | 5504(2) | 35(1) |
| C(8) | 5613(3) | 4083(1) | 4657(2) | 36(1) |
| C(10) | 9164(3) | 4068(1) | 4673(2) | 39(1) |
| C(1) | 6052(3) | 3298(1) | 6399(2) | 38(1) |
| C(17) | 9251(3) | 5688(1) | 1887(2) | 43(1) |
| C(12) | 8775(3) | 5019(1) | 1973(2) | 39(1) |
| C(11) | 9240(3) | 4659(1) | 3083(2) | 40(1) |
| C(16) | 8896(3) | 6028(1) | 830(2) | 46(1) |
| C(13) | 7947(3) | 4678(1) | 991(2) | 42(1) |
| C(6) | 4259(3) | 3313(1) | 6540(2) | 48(1) |
| C(18) | 5112(3) | 4812(1) | 2876(2) | 45(1) |
| C(15) | 8087(3) | 5689(1) | -133(2) | 51(1) |
| C(14) | 7612(3) | 5017(1) | -53(2) | 49(1) |
| C(2) | 7187(3) | 2872(1) | 7107(2) | 51(1) |
| C(5) | 3625(4) | 2913(1) | 7368(2) | 56(1) |
| C(4) | 4750(4) | 2488(1) | 8052(2) | 61(1) |
| C(3) | 6527(4) | 2472(1) | 7925(2) | 64(1) |
| C(19) | 6617(4) | 3659(2) | 191(2) | 64(1) |
| C(20) | 8904(5) | 7072(2) | -182(3) | 83(1) |

**Table S6. Bond lengths [Å] and angles [°] for 3-(2,5-dimethoxyphenyl)-5-methyl-7-phenyl-[1,2,4] triazolo [4,3-a]pyrimidine (2h).**

| O(1)-C(13) | 1.369(3) |
| --- | --- |
| O(1)-C(19) | 1.427(3) |
| N(2)-C(11) | 1.381(3) |
| N(2)-C(9) | 1.384(3) |
| N(2)-C(10) | 1.394(3) |
| O(2)-C(16) | 1.372(3) |
| O(2)-C(20) | 1.423(3) |
| N(1)-C(7) | 1.317(3) |
| N(1)-C(10) | 1.353(3) |
| N(4)-C(10) | 1.314(3) |
| N(4)-N(3) | 1.387(3) |
| N(3)-C(11) | 1.310(3) |
| C(9)-C(8) | 1.354(3) |
| C(9)-C(18) | 1.488(3) |
| C(7)-C(8) | 1.427(3) |
| C(7)-C(1) | 1.488(3) |
| C(8)-H(8) | 0.93 |
| C(1)-C(6) | 1.389(3) |
| C(1)-C(2) | 1.391(3) |
| C(17)-C(12) | 1.382(3) |
| C(17)-C(16) | 1.394(3) |
| C(17)-H(17) | 0.93 |
| C(12)-C(13) | 1.398(3) |
| C(12)-C(11) | 1.475(3) |
| C(16)-C(15) | 1.376(3) |
| C(13)-C(14) | 1.380(3) |
| C(6)-C(5) | 1.382(3) |
| C(6)-H(6) | 0.93 |
| C(18)-H(18A) | 0.96 |
| C(18)-H(18B) | 0.96 |
| C(18)-H(18C) | 0.96 |
| C(15)-C(14) | 1.385(4) |
| C(15)-H(15) | 0.93 |
| C(14)-H(14) | 0.93 |
| C(2)-C(3) | 1.384(3) |
| C(2)-H(2) | 0.93 |
| C(5)-C(4) | 1.372(4) |
| C(5)-H(5) | 0.93 |
| C(4)-C(3) | 1.373(4) |
| C(4)-H(4) | 0.93 |
| C(3)-H(3) | 0.93 |
| C(19)-H(19A) | 0.96 |
| C(19)-H(19B) | 0.96 |
| C(19)-H(19C) | 0.96 |
| C(20)-H(20A) | 0.96 |
| C(20)-H(20B) | 0.96 |
| C(20)-H(20C) | 0.96 |
| C(13)-O(1)-C(19) | 117.31(19) |
| C(11)-N(2)-C(9) | 135.15(17) |
| C(11)-N(2)-C(10) | 104.59(17) |
| C(9)-N(2)-C(10) | 120.10(17) |
| C(16)-O(2)-C(20) | 116.9(2) |
| C(7)-N(1)-C(10) | 116.98(17) |
| C(10)-N(4)-N(3) | 106.47(18) |
| C(11)-N(3)-N(4) | 109.40(18) |
| C(8)-C(9)-N(2) | 116.32(18) |
| C(8)-C(9)-C(18) | 124.04(19) |
| N(2)-C(9)-C(18) | 119.64(18) |
| N(1)-C(7)-C(8) | 121.87(19) |
| N(1)-C(7)-C(1) | 116.95(18) |
| C(8)-C(7)-C(1) | 121.16(19) |
| C(9)-C(8)-C(7) | 121.40(19) |
| C(9)-C(8)-H(8) | 119.3 |
| C(7)-C(8)-H(8) | 119.3 |
| N(4)-C(10)-N(1) | 126.58(19) |
| N(4)-C(10)-N(2) | 110.39(19) |
| N(1)-C(10)-N(2) | 123.00(19) |
| C(6)-C(1)-C(2) | 118.4(2) |
| C(6)-C(1)-C(7) | 121.86(19) |
| C(2)-C(1)-C(7) | 119.7(2) |
| C(12)-C(17)-C(16) | 120.4(2) |
| C(12)-C(17)-H(17) | 119.8 |
| C(16)-C(17)-H(17) | 119.8 |
| C(17)-C(12)-C(13) | 119.8(2) |
| C(17)-C(12)-C(11) | 119.70(19) |
| C(13)-C(12)-C(11) | 120.4(2) |
| N(3)-C(11)-N(2) | 109.14(18) |
| N(3)-C(11)-C(12) | 123.81(19) |
| N(2)-C(11)-C(12) | 126.99(18) |
| O(2)-C(16)-C(15) | 125.1(2) |
| O(2)-C(16)-C(17) | 115.5(2) |
| C(15)-C(16)-C(17) | 119.4(2) |
| O(1)-C(13)-C(14) | 125.1(2) |
| O(1)-C(13)-C(12) | 115.59(19) |
| C(14)-C(13)-C(12) | 119.3(2) |
| C(5)-C(6)-C(1) | 120.6(2) |
| C(5)-C(6)-H(6) | 119.7 |
| C(1)-C(6)-H(6) | 119.7 |
| C(9)-C(18)-H(18A) | 109.5 |
| C(9)-C(18)-H(18B) | 109.5 |
| H(18A)-C(18)-H(18B) | 109.5 |
| C(9)-C(18)-H(18C) | 109.5 |
| H(18A)-C(18)-H(18C) | 109.5 |
| H(18B)-C(18)-H(18C) | 109.5 |
| C(16)-C(15)-C(14) | 120.4(2) |
| C(16)-C(15)-H(15) | 119.8 |
| C(14)-C(15)-H(15) | 119.8 |
| C(13)-C(14)-C(15) | 120.6(2) |
| C(13)-C(14)-H(14) | 119.7 |
| C(15)-C(14)-H(14) | 119.7 |
| C(3)-C(2)-C(1) | 120.2(2) |
| C(3)-C(2)-H(2) | 119.9 |
| C(1)-C(2)-H(2) | 119.9 |
| C(4)-C(5)-C(6) | 120.6(2) |
| C(4)-C(5)-H(5) | 119.7 |
| C(6)-C(5)-H(5) | 119.7 |
| C(5)-C(4)-C(3) | 119.4(2) |
| C(5)-C(4)-H(4) | 120.3 |
| C(3)-C(4)-H(4) | 120.3 |
| C(4)-C(3)-C(2) | 120.8(2) |
| C(4)-C(3)-H(3) | 119.6 |
| C(2)-C(3)-H(3) | 119.6 |
| O(1)-C(19)-H(19A) | 109.5 |
| O(1)-C(19)-H(19B) | 109.5 |
| H(19A)-C(19)-H(19B) | 109.5 |
| O(1)-C(19)-H(19C) | 109.5 |
| H(19A)-C(19)-H(19C) | 109.5 |
| H(19B)-C(19)-H(19C) | 109.5 |
| O(2)-C(20)-H(20A) | 109.5 |
| O(2)-C(20)-H(20B) | 109.5 |
| H(20A)-C(20)-H(20B) | 109.5 |
| O(2)-C(20)-H(20C) | 109.5 |
| H(20A)-C(20)-H(20C) | 109.5 |
| H(20B)-C(20)-H(20C) | 109.5 |

Symmetry transformations used to generate equivalent atoms:

**Table S7. Anisotropic displacement parameters (Å2x 103) for 3-(2,5-dimethoxyphenyl)-5-methyl-7-phenyl-[1,2,4] triazolo [4,3-a]pyrimidine (2h). The anisotropic displacement factor exponent takes the form: -2π2[ h2a*2U11 + ... + 2 h k a* b* U12]**

|  | U11 | U22 | U33 | U23 | U13 | U12 |
| --- | --- | --- | --- | --- | --- | --- |
| O(1) | 64(1) | 53(1) | 46(1) | -4(1) | 0(1) | -5(1) |
| N(2) | 31(1) | 42(1) | 29(1) | 1(1) | -1(1) | 0(1) |
| O(2) | 67(1) | 62(1) | 59(1) | 18(1) | 2(1) | -10(1) |
| N(1) | 40(1) | 47(1) | 34(1) | 5(1) | 0(1) | 1(1) |
| N(4) | 35(1) | 78(1) | 48(1) | 19(1) | 0(1) | 4(1) |
| N(3) | 36(1) | 80(2) | 47(1) | 18(1) | 4(1) | 2(1) |
| C(9) | 32(1) | 39(1) | 31(1) | -2(1) | 0(1) | 1(1) |
| C(7) | 40(1) | 36(1) | 29(1) | -2(1) | 2(1) | 0(1) |
| C(8) | 33(1) | 42(1) | 34(1) | 0(1) | 5(1) | 1(1) |
| C(10) | 33(1) | 48(1) | 34(1) | 3(1) | -2(1) | 3(1) |
| C(1) | 49(1) | 35(1) | 30(1) | -1(1) | 4(1) | -2(1) |
| C(17) | 37(1) | 57(1) | 36(1) | 2(1) | 3(1) | -3(1) |
| C(12) | 30(1) | 55(1) | 32(1) | 4(1) | 5(1) | 2(1) |
| C(11) | 34(1) | 53(1) | 33(1) | 3(1) | 3(1) | -1(1) |
| C(16) | 37(1) | 56(1) | 45(1) | 9(1) | 8(1) | 0(1) |
| C(13) | 38(1) | 53(1) | 37(1) | 0(1) | 7(1) | 2(1) |
| C(6) | 52(1) | 48(1) | 44(1) | 5(1) | 8(1) | 0(1) |
| C(18) | 34(1) | 58(1) | 41(1) | 12(1) | 4(1) | 7(1) |
| C(15) | 45(1) | 70(2) | 36(1) | 12(1) | 4(1) | 6(1) |
| C(14) | 43(1) | 68(2) | 34(1) | -1(1) | -1(1) | 4(1) |
| C(2) | 55(1) | 52(1) | 44(1) | 10(1) | 4(1) | 2(1) |
| C(5) | 61(2) | 57(2) | 53(1) | 5(1) | 18(1) | -7(1) |
| C(4) | 82(2) | 54(2) | 51(2) | 11(1) | 18(1) | -10(1) |
| C(3) | 82(2) | 55(2) | 52(2) | 21(1) | 4(1) | 7(1) |
| C(19) | 65(2) | 64(2) | 59(2) | -14(1) | -1(1) | -7(1) |
| C(20) | 91(2) | 73(2) | 83(2) | 38(2) | 0(2) | -8(2) |

**Table S8. Hydrogen coordinates (x 104) and isotropic displacement parameters (Å2x 103)**

**for 3-(2,5-dimethoxyphenyl)-5-methyl-7-phenyl-[1,2,4] triazolo [4,3-a]pyrimidine (2h).**

|  | X | Y | Z | U(eq) |
| --- | --- | --- | --- | --- |
| H(8) | 4396 | 4091 | 4702 | 44 |
| H(17) | 9813 | 5914 | 2538 | 52 |
| H(6) | 3479 | 3593 | 6073 | 57 |
| H(18A) | 3911 | 4827 | 3055 | 67 |
| H(18B) | 5124 | 4599 | 2136 | 67 |
| H(18C) | 5568 | 5263 | 2848 | 67 |
| H(15) | 7857 | 5911 | -842 | 61 |
| H(14) | 7062 | 4793 | -709 | 59 |
| H(2) | 8394 | 2856 | 7031 | 61 |
| H(5) | 2425 | 2933 | 7462 | 67 |
| H(4) | 4313 | 2213 | 8597 | 74 |
| H(3) | 7295 | 2188 | 8395 | 76 |
| H(19A) | 5531 | 3893 | -89 | 96 |
| H(19B) | 6342 | 3212 | 429 | 96 |
| H(19C) | 7355 | 3633 | -416 | 96 |
| H(20A) | 9488 | 6895 | -799 | 125 |
| H(20B) | 9242 | 7535 | -46 | 125 |
| H(20C) | 7634 | 7043 | -394 | 125 |

**ANTIPROLIFERATIVE RESULTS AGAINST MG-63:-Osteosarcoma bone cancer cell line (Human)**

**5-methyl-3,7-diphenyl-[1,2,4]triazolo[4,3-a]pyrimidine (2a)**


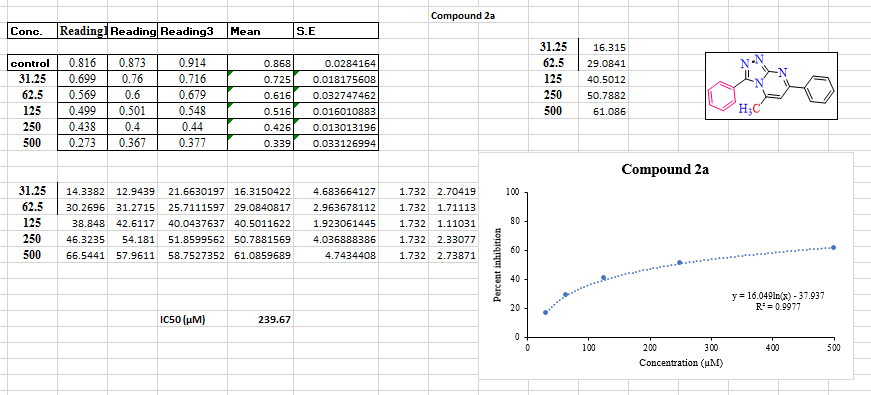


**5-methyl-7-phenyl-3-p-tolyl-[1,2,4]triazolo[4,3-a]pyrimidine (2b)**


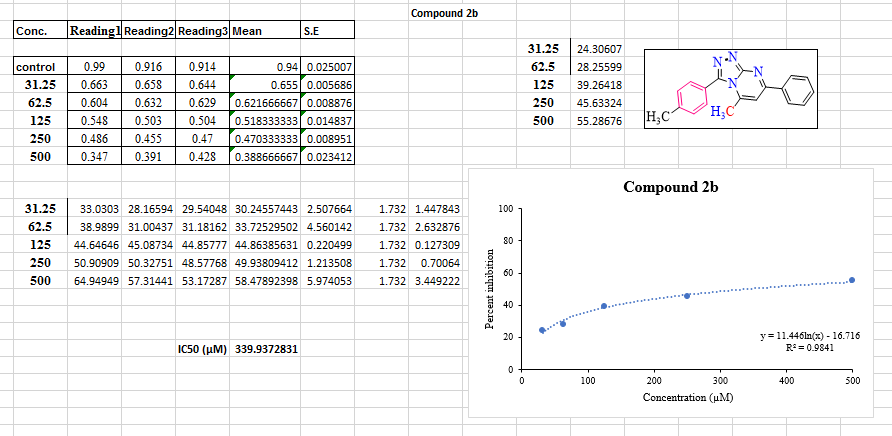


**3-(4-methoxyphenyl)-5-methyl-7-phenyl-[1,2,4]triazolo[4,3-a] pyrimidine (2c)**


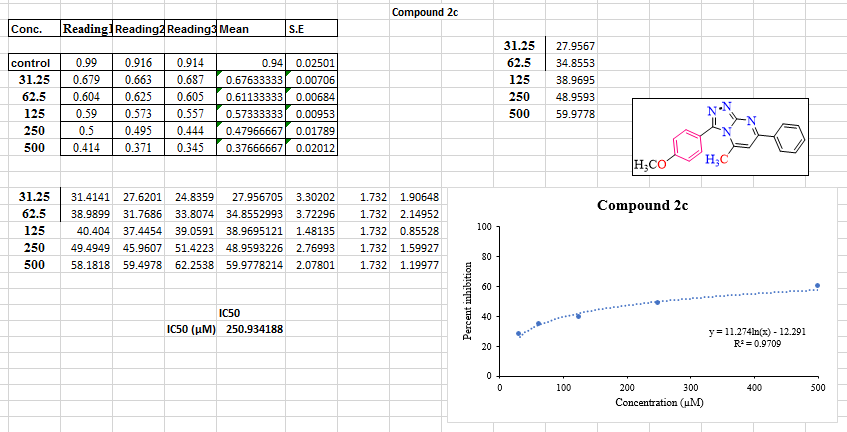


**3-(4-chlorophenyl)-5-methyl-7-phenyl-[1,2,4]triazolo[4,3-a] pyrimidine (2d)**


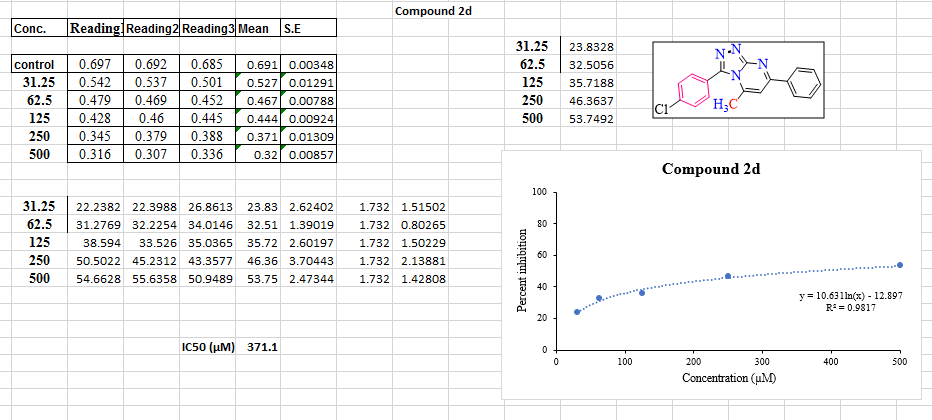


**3-(2-chlorophenyl)-5-methyl-7-phenyl-[1,2,4]triazolo[4,3-a] pyrimidine (2e)**


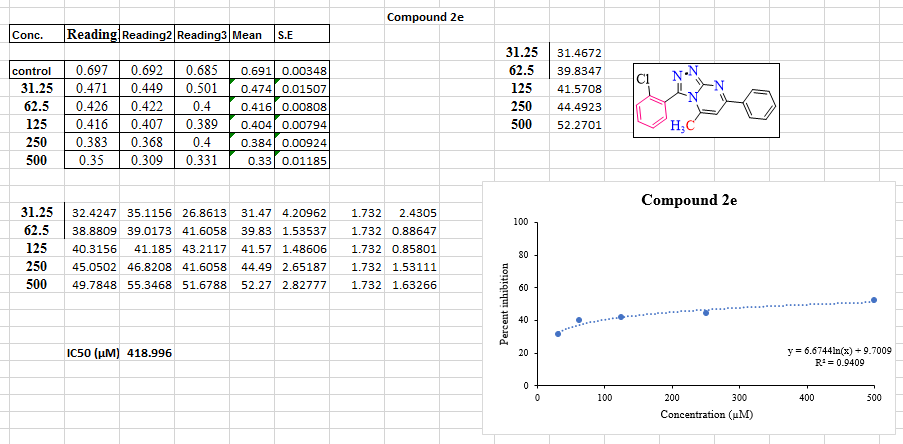


**3-(4-isopropylphenyl)-5-methyl-7-phenyl-[1,2,4]triazolo[4,3-a]pyrimidine (2f)**


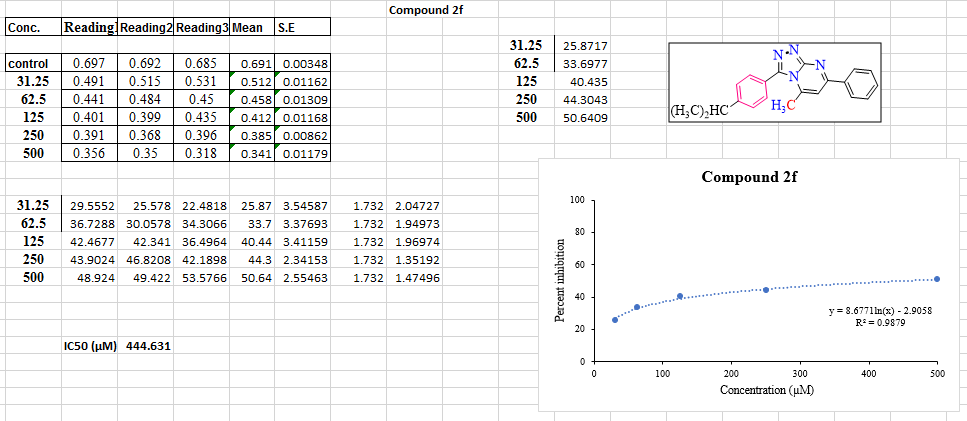


**3-(2,4-dichlorophenyl)-5-methyl-7-phenyl-[1,2,4]triazolo[4,3-a]pyrimidine (2g)**


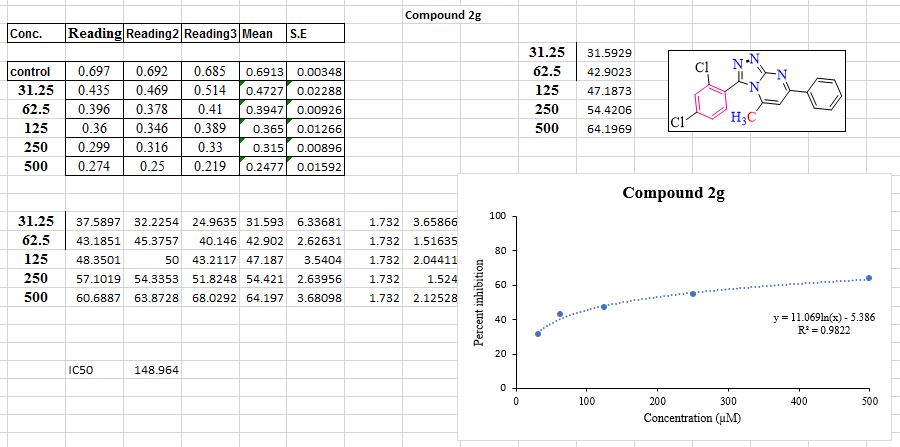


**3-(2,5-dimethoxyphenyl)-5-methyl-7-phenyl-[1,2,4]triazolo [4,3-a]pyrimidine (2h)**


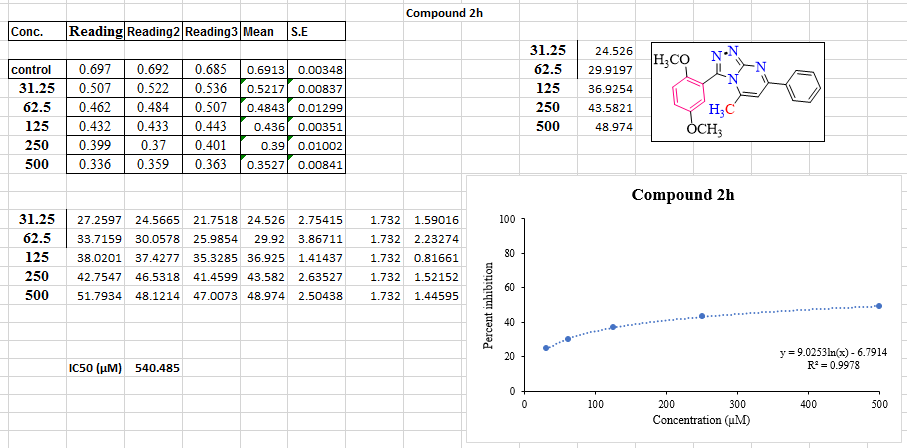


**3-(3-methoxyphenyl)-5-methyl-7-phenyl-[1,2,4]triazolo[4,3-a] pyrimidine (2i)**


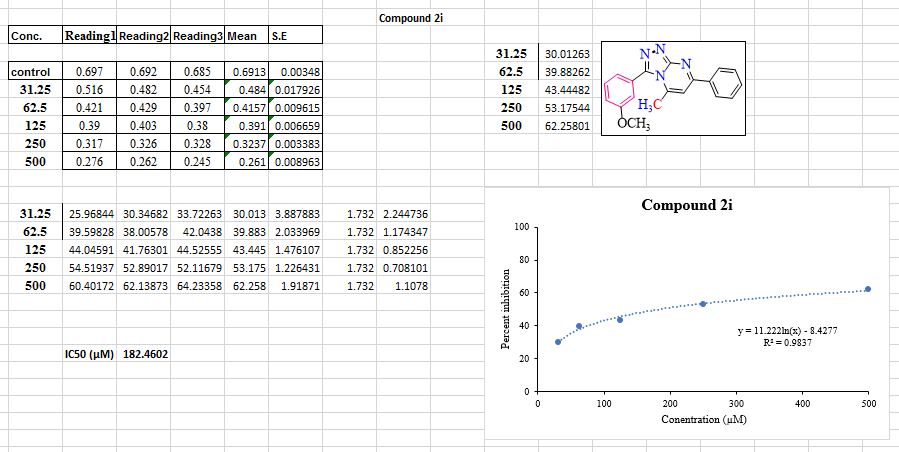


**5-methyl-3-(naphthalen-1-yl)-7-phenyl-[1,2,4]triazolo[4,3-a] pyrimidine (2j)**


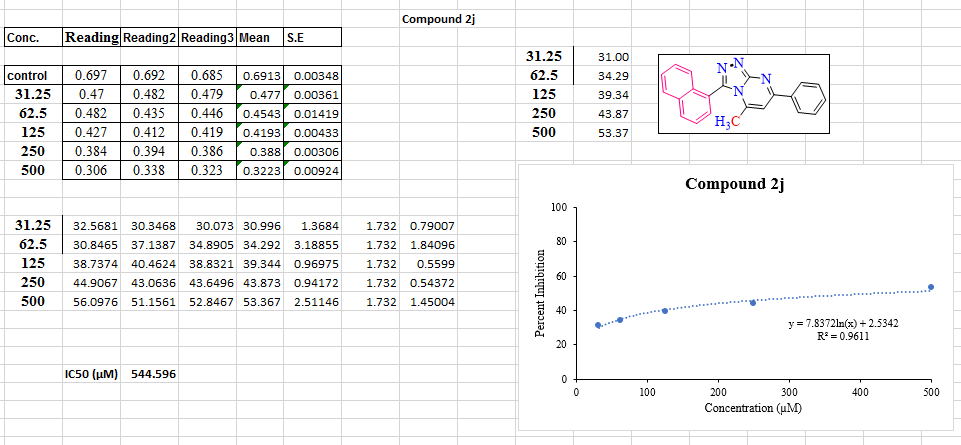


**3-(4-(trifluoromethyl)phenyl)-5-methyl-7-phenyl-[1,2,4] triazolo[4,3-a]pyrimidine (2k)**


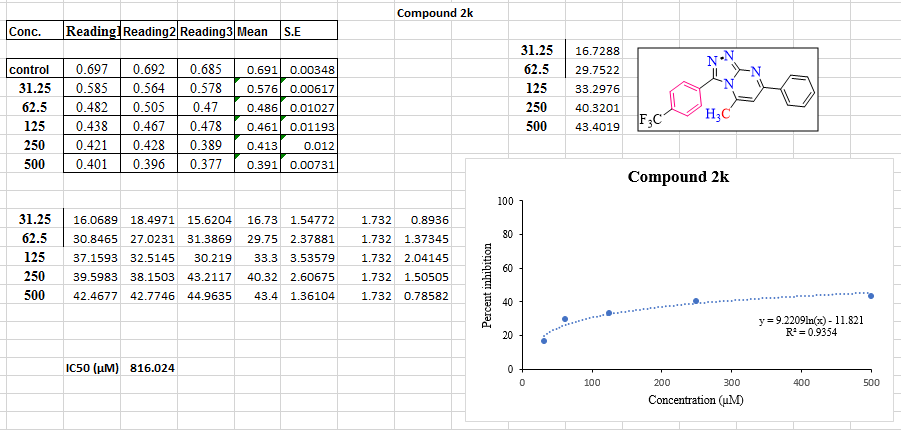


***ANTIPROLIFERATIVE RESULTS AGAINST MCF-7 (Breast cancer cell line (Human)***

**5-methyl-3,7-diphenyl-[1,2,4]triazolo[4,3-a]pyrimidine (2a)**


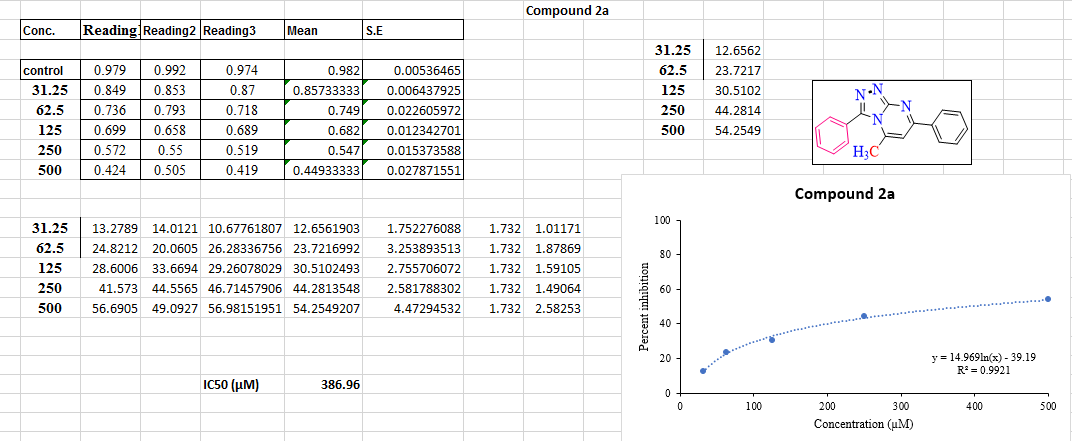


**3-(4-methoxyphenyl)-5-methyl-7-phenyl-[1,2,4]triazolo[4,3-a] pyrimidine (2c)**


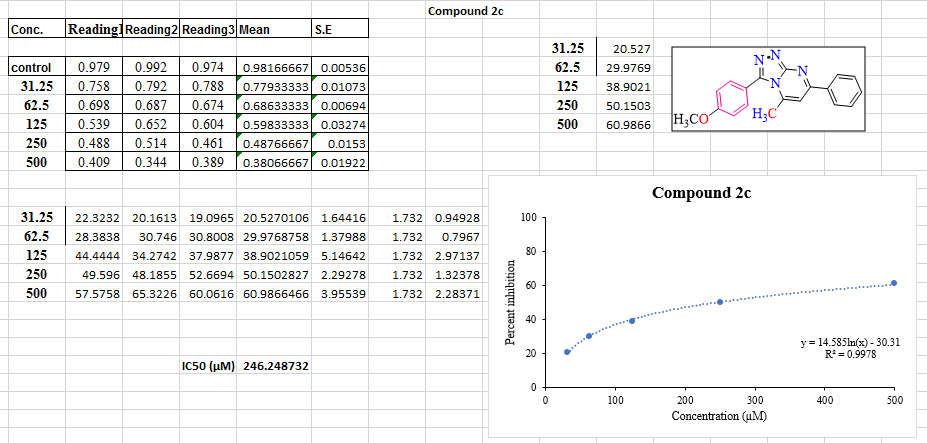


**3-(2,4-dichlorophenyl)-5-methyl-7-phenyl-[1,2,4]triazolo[4,3-a]pyrimidine (2g)**


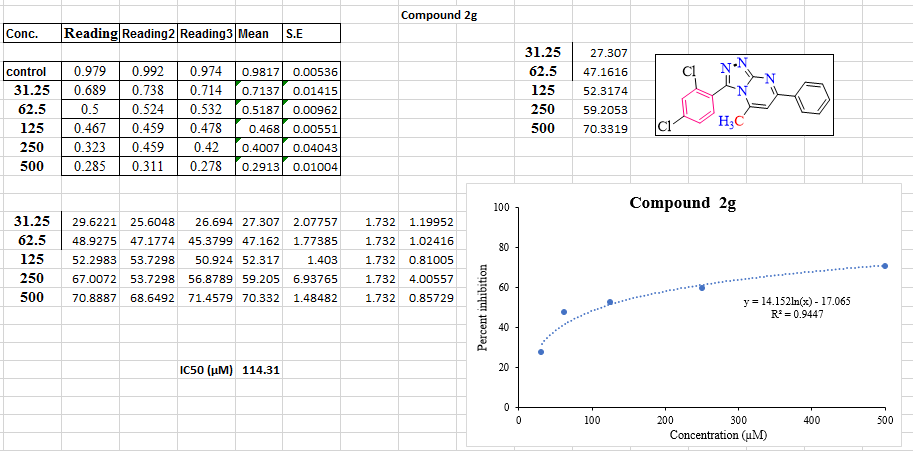


**3-(3-methoxyphenyl)-5-methyl-7-phenyl-[1,2,4]triazolo[4,3-a] pyrimidine (2i)**


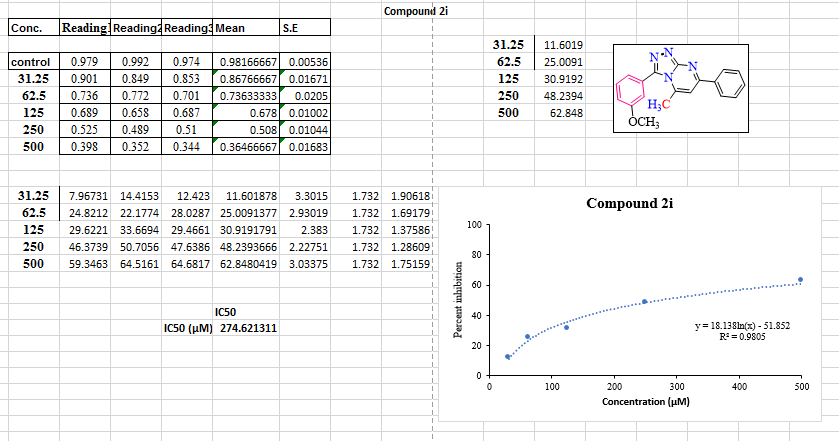

Supplement: Supplementary file 1 [file 23209211]
